# Supplementary material
Source: publisher figshare collection journal article supplement (https://sage.figshare.com/ndownloader/files/14375582)
Supplement: Supplementary file 1 [file 14375582]

*Paraprofessionals’ response on the Intervention Rating Profile (adapted from Witt & Elliot, 1985)*

Responses on questionnaire

|  | Acceptable IV | Appropriate for other kids | Supports child’s needs | I would suggest to others | Child’s needs warrant IV | IV is suitable for child | Willing to use IV in classroom | No negative side effects |
| --- | --- | --- | --- | --- | --- | --- | --- | --- |
| Angela | 5 | 5 | 4 | 5 | 4 | 5 | 5 | 5 |
| Carla | 6 | 6 | 6 | 6 | 6 | 6 | 6 | 6 |
| Felicia | 6 | 6 | 6 | 6 | 6 | 5 | 6 | 6 |
| Gabby | 5 | 4 | 5 | 4 | 4 | 5 | 6 | 5 |
| **Average** | 5.5 | 5.25 | 5.25 | 5.25 | 5 | 5.25 | 5.75 | 5.5 |

|  | Appropriate IV for variety of kids | Consistent with other classroom strategies | Fair way to handle child’s needs | Reasonable for child’s needs | I like procedures in IV | Good way to handle child’s needs | Beneficial intervention for child |
| --- | --- | --- | --- | --- | --- | --- | --- |
| Angela | 5 | 6 | 5 | 5 | 5 | 5 | 6 |
| Carla | 6 | 6 | 6 | 6 | 6 | 6 | 6 |
| Felicia | 6 | 4 | 5 | 6 | 6 | 6 | 6 |
| Gabby | 6 | 6 | 5 | 5 | 6 | 5 | 6 |
| **Average** | 5.75 | 5.5 | 5.25 | 5.5 | 5.75 | 5.5 | 6 |

*Note*. IV= Independent variable; based on a Likert scale spanning from *strongly disagree* (0) to *strongly agree* (6).

Open Ended Responses:

Felicia: “*This study has been an eye opener for me in the way that I read a story. I not only need to make the story enjoyable, I have to take it further by making sure that there is also an understanding of the story and its contents*.”

Gabby: “*The paras I know do what the teachers asks according to the students’ IEP goals. I feel that Dialogic reading is great, as long as the student’s abilities as well as their ‘window’ of focus is respected*.”
